# Supplementary material for: A de novo SIX1 variant in a patient with a rare nonsyndromic cochleovestibular nerve abnormality, cochlear hypoplasia, and bilateral sensorineural hearing loss
Source: PubMed Central journal article supplement — Mol Genet Genomic Med. 2019 Oct 8;7(12):e995. doi: 10.1002/mgg3.995 (PMC6900394; doi:10.1002/mgg3.995), 2019-10-08
Supplement: MGG3-7-e995-s001.pdf [file MGG3-7-e995-s001.pdf]

| NM_005982:exon1:c.A520T:p.N174Y |          |
|---------------------------------|----------|
| SIFT_score                      | 0        |
| SIFT_pred                       | D        |
| Polyphen2_HDIV_score            | 1        |
| Polyphen2_HDIV_pred             | D        |
| Polyphen2_HVAR_score            | 1        |
| Polyphen2_HVAR_pred             | D        |
| LRT_score                       | 0        |
| LRT_pred                        | D        |
| MutationTaster_score            | 1        |
| MutationTaster_pred             | D        |
| MutationAssessor_score          | 4.665    |
| MutationAssessor_pred           | H        |
| FATHMM_score                    | -5.82    |
| FATHMM_pred                     | D        |
| PROVEAN_score                   | -7.1     |
| PROVEAN_pred                    | D        |
| VEST3_score                     | 0.929    |
| DANN_score                      | 0.993    |
| fathmm.MKL_coding_score         | 0.994    |
| fathmm.MKL_coding_pred          | D        |
| MetaSVM_score                   | 0.958    |
| MetaSVM_pred                    | D        |
| MetaLR_score                    | 0.99     |
| MetaLR_pred                     | D        |
| integrated_fitCons_score        | 0.598    |
| integrated_confidence_value     | 0        |
| GERP.._RS                       | 5.96     |
| phyloP7way_vertebrate           | 0.991    |
| phyloP20way_mammalian           | 1.057    |
| phastCons7way_vertebrate        | 1        |
| phastCons20way_mammalian        | 1        |
| CADD(v1.3)_RawScore             | 6.283894 |
| CADD(v1.3)_PHRED                | 29.1     |
